# Supplementary material
Source: Springer Nature journal article supplement (https://www.springermedizin.de/resource/supplementary/12985_2011_1833_MOESM3_ESM.pdf/9610664)

### (a) Complete genome

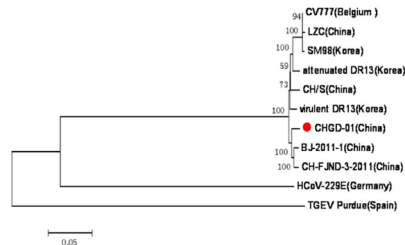

### (b) S

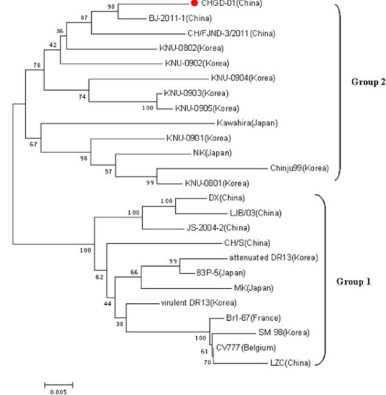

### (c) ORF3

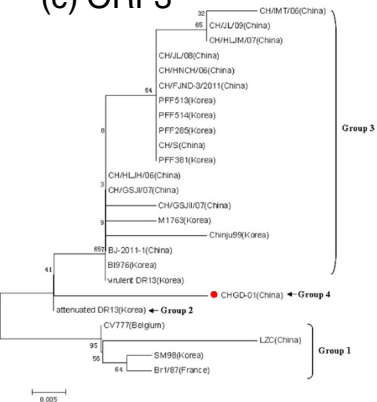

### (d) M

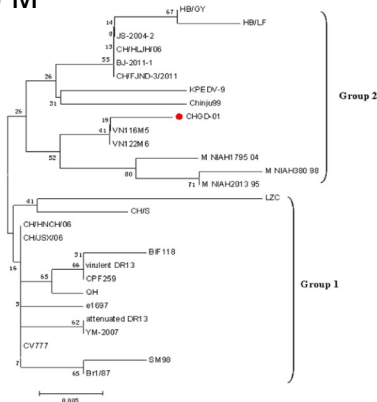

### (e) N

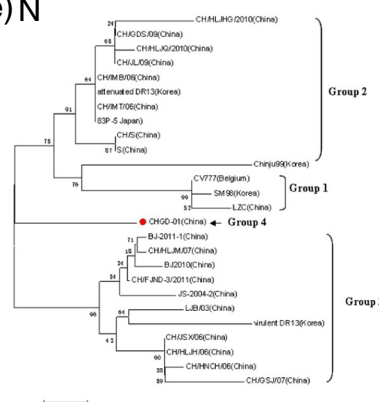

Supplement: MOESM3 [file 9610664]
